# Supplementary material for: Monthly Dynamics of Plasma Elements, Hematology, Oxidative Stress Markers, and Hormonal Concentrations in Growing Male Shiba Goats (Capra hircus) Reared in Tokyo-Japan
Source: MDPI journal article supplement (doi:10.3390/ani12050645), 2022-03-03
Supplement: s1 [file s1]

Supplementary Table S1. plasma minerals, oxidative stress markers, and hormonal profile during the first-five months of life in male Shiba goats

| Variables                | Age (month)                       |                                   |                                    |                                   |                                  | P value   |
|--------------------------|-----------------------------------|-----------------------------------|------------------------------------|-----------------------------------|----------------------------------|-----------|
|                          | M1                                | M2                                | M3                                 | M4                                | M5                               |           |
| Plasma elements          |                                   |                                   |                                    |                                   |                                  |           |
| Cu (mg/L)                | 0.890 (0.51–1.365) <sup>a</sup>   | 0.854 (0.741–1.357) <sup>a</sup>  | 0.9525 (0.757–1.125) <sup>a</sup>  | 0.707 (0.002–0.991) <sup>b</sup>  | 0.701 (0.461–0.969) <sup>b</sup> | 0.0001*** |
| Zn (mg/L)                | 0.645 (0.367–1.2) <sup>a</sup>    | 0.607 (0.301–1.643) <sup>a</sup>  | 0.569 (0.206–0.902) <sup>a</sup>   | 0.569 (0.172–1.018) <sup>a</sup>  | 0.474 (0.169–0.755) <sup>a</sup> | 0.185     |
| Se (mg/L)                | 0.062 (0.029–0.097) <sup>a</sup>  | 0.0645 (0.043–0.127) <sup>a</sup> | 0.0605 (0.031–0.179) <sup>a</sup>  | 0.054 (0.027–0.325) <sup>a</sup>  | 0.044 (0.023–0.154) <sup>a</sup> | 0.292     |
| Fe (mg/L)                | 2.986 (1.75–5.83) <sup>a</sup>    | 2.638 (2.103–4.492) <sup>ab</sup> | 2.18 (1.646–4.078) <sup>bc</sup>   | 2.236 (1.305–3.648) <sup>c</sup>  | 1.969 (1.215–3.139) <sup>c</sup> | 0.0001*** |
| Cr (mg/L)                | 0.042 (0.013–0.059) <sup>b</sup>  | 0.048 (0.027–0.111) <sup>ab</sup> | 0.0585 (0.039–0.107) <sup>a</sup>  | 0.06 (0.015–0.127) <sup>a</sup>   | 0.045 (0.029–0.147) <sup>a</sup> | 0.045*    |
| Ca (mg/L)                | 44.65 (29.12–68.31) <sup>a</sup>  | 43.52 (36.03–57.04) <sup>a</sup>  | 42.33 (32.24–56.52) <sup>ab</sup>  | 43.57 (22.66–50.3) <sup>ab</sup>  | 33.61 (22.22–52.58) <sup>b</sup> | 0.006**   |
| Mg (mg/L)                | 23.3 (14.05–34.61) <sup>a</sup>   | 23.28 (17.71–33.7) <sup>a</sup>   | 25.3 (17.42–28.49) <sup>a</sup>    | 23.51 (12.36–30.81) <sup>a</sup>  | 15.59 (11.45–20.01) <sup>b</sup> | 0.0001*** |
| Oxidative stress markers |                                   |                                   |                                    |                                   |                                  |           |
| MAD (nmol/mL)            | 17.35 (15.4–23.6) <sup>a</sup>    | 15.6 (13.1–19.4) <sup>a</sup>     | 17.5 (13.3–24) <sup>a</sup>        | 17.35 (13.3–23.1) <sup>a</sup>    | 16.1 (13.8–21.6) <sup>a</sup>    | 0.368     |
| CAT (u/L)                | 278 (222–359) <sup>b</sup>        | 351 (233–417) <sup>a</sup>        | 339 (270–452) <sup>a</sup>         | 304 (245–480) <sup>ab</sup>       | 281 (252–355) <sup>ab</sup>      | 0.043*    |
| SOD (u/ml)               | 3.84 (3.13–4.11) <sup>b</sup>     | 4.02 (3.2–5.27) <sup>ab</sup>     | 4.28 (3.1–6.16) <sup>a</sup>       | 4.13 (3.59–6.36) <sup>a</sup>     | 3.75 (3.52–4.48) <sup>ab</sup>   | 0.140     |
| GPX (u/mL)               | 131.5 (116–147) <sup>c</sup>      | 141.5 (121–164) <sup>bc</sup>     | 142 (127–180) <sup>ab</sup>        | 151.5 (138–189) <sup>a</sup>      | 154 (133–179) <sup>a</sup>       | 0.001**   |
| Plasma hormones          |                                   |                                   |                                    |                                   |                                  |           |
| Cortisol (ng/mL)         | 23.34 (9.95–31.02) <sup>ab</sup>  | 15.84 (7.514–42.24) <sup>b</sup>  | 21.73 (6.361–55.37) <sup>ab</sup>  | 21.44 (12.03–38.87) <sup>ab</sup> | 24.56 (10.98–49.23) <sup>a</sup> | 0.124     |
| FSH (ng/mL)              | 0.874 (0.421–1.53) <sup>a</sup>   | 0.442 (0.267–3.049) <sup>a</sup>  | 0.993 (0.2401–3.014) <sup>a</sup>  | 0.673 (0.1257–2.73) <sup>a</sup>  | 0.439 (0.054–2.342) <sup>a</sup> | 0.489     |
| LH (ng/mL)               | 0.548 (0.0357–1.862) <sup>a</sup> | 0.359 (0.1–1.292) <sup>ab</sup>   | 0.259 (0.0778–1.973) <sup>ab</sup> | 0.169 (0.1–0.735) <sup>b</sup>    | 0.198 (0.083–1.034) <sup>b</sup> | 0.039*    |
| IGF1 (ng/mL)             | 141.9 (80–251.2) <sup>c</sup>     | 132 (78–361.9) <sup>bc</sup>      | 212.2 (130.9–321.2) <sup>a</sup>   | 203.5 (72.67–311) <sup>ab</sup>   | 140 (91.39–223.9) <sup>c</sup>   | 0.007**   |
| Inhibin (ng/mL)          | 10.61 (2.215–18.55) <sup>ab</sup> | 10.67 (2.629–20.95) <sup>a</sup>  | 12.99 (7.288–19.95) <sup>a</sup>   | 8.966 (2.876–17.52) <sup>a</sup>  | 8.129 (6.286–13.73) <sup>b</sup> | 0.011*    |
| Testosterone (ng/mL)     | 159 (20.5–639.2) <sup>b</sup>     | 426 (80.66–995.2) <sup>a</sup>    | 280.1 (38.33–816) <sup>ab</sup>    | 398.7 (94.98–900) <sup>ab</sup>   | 431.5 (144.4–700) <sup>a</sup>   | 0.046*    |
| T3 (nmol/L)              | 17.68 (8.52–23.55) <sup>a</sup>   | 12.57 (11.45–14.8) <sup>bc</sup>  | 15.64 (7.83–18.9) <sup>ab</sup>    | 10.02 (5.37–17.68) <sup>cd</sup>  | 9.72 (5.18–14) <sup>d</sup>      | 0.0001*** |
| T4 (nmol/L)              | 11.3 (6.1–18.7) <sup>a</sup>      | 9.15 (8–11.5) <sup>bc</sup>       | 10.95 (5.6–12.9) <sup>ab</sup>     | 7.05 (3.9–12.7) <sup>cd</sup>     | 7 (3.7–9.8) <sup>d</sup>         | 0.0001*** |

Values are expressed as median and range (n = 16). \* P < 0.05, \*\* P < 0.01, \*\*\*P < 0.001. Abbreviations: Cu, copper; Zn, zinc; Fe, iron; Se, selenium; Cr, chromium; Ca, calcium; Mg, magnesium; MDA, malondialdehyde; CAT, catalase; SOD, superoxide dismutase; GPX, glutathione peroxidase; IGF1, insulin-like growth factor 1; T3, triiodothyronine; T4, tetraiodothyronine; FSH, follicular stimulating hormones; LH, leutinizing hormone.
